# Supplementary material
Source: publisher figshare collection journal article supplement (https://gsapubs.figshare.com/ndownloader/files/23304935)
Supplement: Supplementary file 1 [file 23304935]

GSA Data Repository 2017237

**Liu, Q., Zhao, G., Han, Y., Eizenhöfer, P.R., Zhu, Y., Wenzhu, H., Zhang, X., and Wang, B., 2017, Geochronology and geochemistry of Permian to Early Triassic granitoids in the Alxa Terrane: Constraints on the final closure of the Paleo-Asian Ocean: Lithosphere, doi:10.1130/L646.1.**

tABLE DR1. Zircon U-Pb dating results

| Dot# | Isotope ratios and errors (±1σ) | | | | | |  | Ages and errors (±1σ) | | | | | | Concor- dance | Th | U | Th/U |
| --- | --- | --- | --- | --- | --- | --- | --- | --- | --- | --- | --- | --- | --- | --- | --- | --- | --- |
| Pb207/Pb206 | | Pb207/U235 | | Pb206/U238 | |  | Pb207/Pb206 | | Pb207/U235 | | Pb206/U238 | | (ppm) | (ppm) |
| Bayan Nuru monzogranite (14LQ01A) | | | | | | | | | | | | | | | | | |
| -01 | 0.051403 | 0.001450 | 0.305365 | 0.008461 | 0.043121 | 0.000400 |  | 257 | 65 | 271 | 7 | 272 | 2 | 101 | 209 | 331 | 0.63 |
| -04 | 0.052040 | 0.002617 | 0.297541 | 0.013629 | 0.042347 | 0.000534 |  | 287 | 115 | 264 | 11 | 267 | 3 | 101 | 109 | 126 | 0.87 |
| -05 | 0.052192 | 0.001818 | 0.306903 | 0.009773 | 0.042886 | 0.000453 |  | 295 | 80 | 272 | 8 | 271 | 3 | 100 | 176 | 276 | 0.64 |
| -07 | 0.054296 | 0.001107 | 0.367918 | 0.007998 | 0.048818 | 0.000430 |  | 383 | 42 | 318 | 6 | 307 | 3 | 97 | 604 | 807 | 0.75 |
| -08 | 0.051957 | 0.001395 | 0.305898 | 0.008432 | 0.042414 | 0.000360 |  | 283 | 61 | 271 | 7 | 268 | 2 | 99 | 230 | 381 | 0.60 |
| -10 | 0.051784 | 0.001672 | 0.303464 | 0.009568 | 0.042567 | 0.000435 |  | 276 | 68 | 269 | 7 | 269 | 3 | 100 | 232 | 384 | 0.60 |
| -11 | 0.051521 | 0.001899 | 0.301019 | 0.010707 | 0.042760 | 0.000461 |  | 265 | 85 | 267 | 8 | 270 | 3 | 101 | 182 | 240 | 0.76 |
| -12 | 0.052373 | 0.001808 | 0.303124 | 0.010244 | 0.042051 | 0.000492 |  | 302 | 84 | 269 | 8 | 266 | 3 | 99 | 236 | 470 | 0.50 |
| -13 | 0.053501 | 0.003486 | 0.298875 | 0.018765 | 0.041883 | 0.000796 |  | 350 | 153 | 266 | 15 | 264 | 5 | 100 | 70 | 86 | 0.81 |
| -14 | 0.052297 | 0.001320 | 0.302110 | 0.007426 | 0.041883 | 0.000325 |  | 298 | 57 | 268 | 6 | 264 | 2 | 99 | 287 | 458 | 0.63 |
| -17 | 0.052075 | 0.001471 | 0.306968 | 0.008475 | 0.042830 | 0.000354 |  | 287 | 60 | 272 | 7 | 270 | 2 | 99 | 288 | 391 | 0.74 |
| -19 | 0.053063 | 0.001622 | 0.310437 | 0.009217 | 0.042393 | 0.000397 |  | 332 | 69 | 275 | 7 | 268 | 2 | 97 | 272 | 377 | 0.72 |
| -20 | 0.052045 | 0.001800 | 0.301505 | 0.010123 | 0.042050 | 0.000438 |  | 287 | 80 | 268 | 8 | 266 | 3 | 99 | 271 | 397 | 0.68 |
| -21 | 0.052319 | 0.002044 | 0.302768 | 0.011480 | 0.042239 | 0.000465 |  | 298 | 89 | 269 | 9 | 267 | 3 | 99 | 149 | 246 | 0.60 |
| -22 | 0.052826 | 0.001548 | 0.306889 | 0.008987 | 0.042057 | 0.000727 |  | 320 | 67 | 272 | 7 | 266 | 4 | 98 | 933 | 1368 | 0.68 |
|  |  |  |  |  |  |  |  |  |  |  |  |  |  |  |  |  |  |
| Bayan Nuru syenogranite (14LQ14A) | | | | | | | | | | | | | | | | | |
| -01 | 0.051954 | 0.001821 | 0.314052 | 0.010752 | 0.043706 | 0.000660 |  | 283 | 75 | 277 | 8 | 276 | 4 | 99 | 907 | 2281 | 0.40 |
| -02 | 0.051693 | 0.001310 | 0.315545 | 0.008303 | 0.044132 | 0.000578 |  | 272 | 57 | 278 | 6 | 278 | 4 | 100 | 638 | 2179 | 0.29 |
| -03 | 0.050379 | 0.001154 | 0.311565 | 0.007252 | 0.044709 | 0.000393 |  | 213 | 49 | 275 | 6 | 282 | 2 | 102 | 391 | 1272 | 0.31 |
| -04 | 0.052471 | 0.003932 | 0.319363 | 0.024204 | 0.043827 | 0.000722 |  | 306 | 177 | 281 | 19 | 277 | 4 | 98 | 150 | 265 | 0.57 |
| -05 | 0.052505 | 0.001678 | 0.326149 | 0.010336 | 0.045060 | 0.000463 |  | 309 | 79 | 287 | 8 | 284 | 3 | 99 | 370 | 708 | 0.52 |
| -07 | 0.052221 | 0.001435 | 0.321240 | 0.008780 | 0.044567 | 0.000497 |  | 295 | 68 | 283 | 7 | 281 | 3 | 99 | 363 | 870 | 0.42 |
| -08 | 0.052351 | 0.001273 | 0.319766 | 0.007493 | 0.044312 | 0.000330 |  | 302 | 56 | 282 | 6 | 280 | 2 | 99 | 253 | 938 | 0.27 |
| -09 | 0.053035 | 0.002080 | 0.316329 | 0.012806 | 0.043174 | 0.000748 |  | 332 | 89 | 279 | 10 | 272 | 5 | 98 | 296 | 544 | 0.54 |
| -10 | 0.051834 | 0.001355 | 0.313688 | 0.008520 | 0.043678 | 0.000434 |  | 280 | 64 | 277 | 7 | 276 | 3 | 99 | 600 | 1224 | 0.49 |
| -11 | 0.052062 | 0.001410 | 0.321795 | 0.008243 | 0.045012 | 0.000422 |  | 287 | 58 | 283 | 6 | 284 | 3 | 100 | 382 | 480 | 0.80 |
| -12 | 0.052233 | 0.001554 | 0.322842 | 0.009361 | 0.044787 | 0.000417 |  | 295 | 64 | 284 | 7 | 282 | 3 | 99 | 253 | 410 | 0.62 |
| -13 | 0.051715 | 0.001047 | 0.319605 | 0.006719 | 0.044746 | 0.000440 |  | 272 | 42 | 282 | 5 | 282 | 3 | 100 | 356 | 1300 | 0.27 |
| -14 | 0.050115 | 0.002757 | 0.301622 | 0.016016 | 0.043736 | 0.000594 |  | 211 | 123 | 268 | 12 | 276 | 4 | 103 | 153 | 393 | 0.39 |
| -15 | 0.053601 | 0.001357 | 0.331084 | 0.008398 | 0.044705 | 0.000377 |  | 354 | 57 | 290 | 6 | 282 | 2 | 97 | 236 | 487 | 0.48 |
| -16 | 0.051505 | 0.000965 | 0.322216 | 0.006691 | 0.045034 | 0.000434 |  | 265 | 43 | 284 | 5 | 284 | 3 | 100 | 473 | 1227 | 0.39 |
| -17 | 0.052363 | 0.001156 | 0.321795 | 0.007761 | 0.044444 | 0.000692 |  | 302 | 50 | 283 | 6 | 280 | 4 | 99 | 866 | 1081 | 0.80 |
| -18 | 0.050627 | 0.001187 | 0.314663 | 0.007340 | 0.044870 | 0.000312 |  | 233 | 54 | 278 | 6 | 283 | 2 | 102 | 389 | 1121 | 0.35 |
| -19 | 0.051452 | 0.001406 | 0.318529 | 0.008340 | 0.044881 | 0.000387 |  | 261 | 63 | 281 | 6 | 283 | 2 | 101 | 262 | 619 | 0.42 |
| -20 | 0.051113 | 0.000998 | 0.316482 | 0.006498 | 0.044762 | 0.000430 |  | 256 | 44 | 279 | 5 | 282 | 3 | 101 | 487 | 1070 | 0.45 |
| -21 | 0.050484 | 0.001147 | 0.312185 | 0.007049 | 0.044629 | 0.000321 |  | 217 | 84 | 276 | 5 | 281 | 2 | 102 | 323 | 937 | 0.34 |
| -22 | 0.054486 | 0.002006 | 0.339753 | 0.012550 | 0.045100 | 0.000435 |  | 391 | 83 | 297 | 10 | 284 | 3 | 96 | 268 | 351 | 0.76 |
| -23 | 0.051426 | 0.001988 | 0.318010 | 0.012300 | 0.044760 | 0.000463 |  | 261 | 89 | 280 | 9 | 282 | 3 | 101 | 300 | 525 | 0.57 |
| -24 | 0.052193 | 0.001566 | 0.319335 | 0.009103 | 0.044472 | 0.000413 |  | 295 | 64 | 281 | 7 | 280 | 3 | 100 | 193 | 379 | 0.51 |
| Yabulai granodiorite (14LQ34A) | | | | | | | | | | | | | | | | | |
| -01 | 0.051755 | 0.001569 | 0.312049 | 0.009692 | 0.043703 | 0.000462 |  | 276 | 66 | 276 | 8 | 276 | 3 | 100 | 303 | 434 | 0.70 |
| -02 | 0.052028 | 0.001593 | 0.313356 | 0.009327 | 0.043813 | 0.000421 |  | 287 | 69 | 277 | 7 | 276 | 3 | 100 | 222 | 302 | 0.74 |
| -03 | 0.051981 | 0.001295 | 0.313912 | 0.007412 | 0.043980 | 0.000383 |  | 283 | 53 | 277 | 6 | 277 | 2 | 100 | 306 | 420 | 0.73 |
| -04 | 0.053500 | 0.002446 | 0.319996 | 0.014298 | 0.043676 | 0.000665 |  | 350 | 104 | 282 | 11 | 276 | 4 | 98 | 256 | 479 | 0.53 |
| -06 | 0.051861 | 0.001797 | 0.316401 | 0.010779 | 0.044329 | 0.000396 |  | 280 | 84 | 279 | 8 | 280 | 2 | 100 | 200 | 284 | 0.71 |
| -08 | 0.051946 | 0.001321 | 0.317969 | 0.007991 | 0.044433 | 0.000327 |  | 283 | 53 | 280 | 6 | 280 | 2 | 100 | 338 | 531 | 0.64 |
| -09 | 0.051691 | 0.001267 | 0.310012 | 0.007393 | 0.043601 | 0.000401 |  | 272 | 57 | 274 | 6 | 275 | 2 | 100 | 360 | 729 | 0.49 |
| -10 | 0.051026 | 0.001463 | 0.304009 | 0.008422 | 0.043503 | 0.000358 |  | 243 | 65 | 270 | 7 | 275 | 2 | 102 | 294 | 332 | 0.88 |
| -11 | 0.055109 | 0.001254 | 0.330255 | 0.007338 | 0.043519 | 0.000341 |  | 417 | 50 | 290 | 6 | 275 | 2 | 95 | 313 | 555 | 0.56 |
| -12 | 0.051835 | 0.001353 | 0.310409 | 0.007796 | 0.043535 | 0.000355 |  | 280 | 64 | 274 | 6 | 275 | 2 | 100 | 254 | 384 | 0.66 |
| -14 | 0.052070 | 0.001293 | 0.312764 | 0.007577 | 0.043504 | 0.000305 |  | 287 | 56 | 276 | 6 | 275 | 2 | 99 | 394 | 526 | 0.75 |
| -15 | 0.053263 | 0.001177 | 0.325611 | 0.007197 | 0.044321 | 0.000386 |  | 339 | 45 | 286 | 6 | 280 | 2 | 98 | 452 | 708 | 0.64 |
| -16 | 0.055459 | 0.001835 | 0.333224 | 0.010346 | 0.043913 | 0.000423 |  | 432 | 74 | 292 | 8 | 277 | 3 | 95 | 297 | 328 | 0.91 |
| -17 | 0.051794 | 0.001622 | 0.317379 | 0.010659 | 0.044051 | 0.000464 |  | 276 | 68 | 280 | 8 | 278 | 3 | 99 | 378 | 465 | 0.81 |
| -18 | 0.051714 | 0.001017 | 0.316887 | 0.006061 | 0.044340 | 0.000336 |  | 272 | 44 | 280 | 5 | 280 | 2 | 100 | 863 | 910 | 0.95 |
| -19 | 0.050519 | 0.002080 | 0.298959 | 0.011022 | 0.043503 | 0.000562 |  | 220 | 101 | 266 | 9 | 275 | 3 | 103 | 243 | 297 | 0.82 |
| -20 | 0.051518 | 0.001866 | 0.314735 | 0.011222 | 0.044304 | 0.000513 |  | 265 | 79 | 278 | 9 | 279 | 3 | 101 | 382 | 433 | 0.88 |
| -21 | 0.051811 | 0.001732 | 0.310187 | 0.009853 | 0.043782 | 0.000453 |  | 276 | 76 | 274 | 8 | 276 | 3 | 101 | 191 | 237 | 0.81 |
| -22 | 0.051956 | 0.001324 | 0.316766 | 0.007886 | 0.044200 | 0.000399 |  | 283 | 53 | 279 | 6 | 279 | 2 | 100 | 394 | 371 | 1.06 |
|  |  |  |  |  |  |  |  |  |  |  |  |  |  |  |  |  |  |
| Yabulai granodiorite (14LQ35A) | | | | | | | | | | | | | | | | | |
| -01 | 0.051155 | 0.001257 | 0.303297 | 0.007364 | 0.042919 | 0.000362 |  | 256 | 56 | 269 | 6 | 271 | 2 | 101 | 479 | 966 | 0.50 |
| -02 | 0.051742 | 0.001223 | 0.305957 | 0.006932 | 0.042870 | 0.000346 |  | 272 | 54 | 271 | 5 | 271 | 2 | 100 | 436 | 1019 | 0.43 |
| -03 | 0.052012 | 0.004592 | 0.300267 | 0.023820 | 0.043315 | 0.000904 |  | 287 | 199 | 267 | 19 | 273 | 6 | 103 | 104 | 128 | 0.81 |
| -04 | 0.053082 | 0.001810 | 0.308914 | 0.010511 | 0.042193 | 0.000406 |  | 332 | 78 | 273 | 8 | 266 | 3 | 97 | 256 | 592 | 0.43 |
| -05 | 0.052975 | 0.001686 | 0.307139 | 0.008739 | 0.041951 | 0.000373 |  | 328 | 72 | 272 | 7 | 265 | 2 | 97 | 322 | 756 | 0.43 |
| -07 | 0.052991 | 0.001472 | 0.317504 | 0.008856 | 0.043230 | 0.000396 |  | 328 | 63 | 280 | 7 | 273 | 2 | 97 | 568 | 1035 | 0.55 |
| -08 | 0.052075 | 0.001572 | 0.306503 | 0.009352 | 0.042524 | 0.000422 |  | 287 | 75 | 271 | 7 | 268 | 3 | 99 | 468 | 893 | 0.52 |
| -09 | 0.051936 | 0.001944 | 0.305846 | 0.011057 | 0.042621 | 0.000449 |  | 283 | 85 | 271 | 9 | 269 | 3 | 99 | 444 | 829 | 0.54 |
| -10 | 0.053257 | 0.001598 | 0.310666 | 0.008919 | 0.042396 | 0.000413 |  | 339 | 36 | 275 | 7 | 268 | 3 | 97 | 444 | 738 | 0.60 |
| -11 | 0.054118 | 0.001429 | 0.323173 | 0.008327 | 0.043224 | 0.000428 |  | 376 | 56 | 284 | 6 | 273 | 3 | 96 | 505 | 900 | 0.56 |
| -12 | 0.052238 | 0.001800 | 0.304719 | 0.009956 | 0.042517 | 0.000433 |  | 295 | 78 | 270 | 8 | 268 | 3 | 99 | 325 | 557 | 0.58 |
| -13 | 0.051218 | 0.001808 | 0.296394 | 0.010204 | 0.041953 | 0.000447 |  | 250 | 81 | 264 | 8 | 265 | 3 | 101 | 135 | 427 | 0.32 |
| -14 | 0.051795 | 0.004428 | 0.291224 | 0.023654 | 0.042009 | 0.000809 |  | 276 | 192 | 260 | 19 | 265 | 5 | 102 | 115 | 204 | 0.56 |
| -15 | 0.051178 | 0.001456 | 0.303498 | 0.008195 | 0.042937 | 0.000392 |  | 256 | 67 | 269 | 6 | 271 | 2 | 101 | 681 | 1247 | 0.55 |
| -16 | 0.051082 | 0.001772 | 0.298259 | 0.010315 | 0.042055 | 0.000434 |  | 256 | 81 | 265 | 8 | 266 | 3 | 100 | 383 | 830 | 0.46 |
| -17 | 0.051791 | 0.001447 | 0.305922 | 0.008368 | 0.042694 | 0.000387 |  | 276 | 65 | 271 | 7 | 270 | 2 | 99 | 352 | 813 | 0.43 |
| -18 | 0.050685 | 0.001287 | 0.300936 | 0.007258 | 0.042985 | 0.000381 |  | 233 | 59 | 267 | 6 | 271 | 2 | 102 | 498 | 976 | 0.51 |
| -19 | 0.051415 | 0.001922 | 0.296400 | 0.010610 | 0.041942 | 0.000498 |  | 261 | 85 | 264 | 8 | 265 | 3 | 100 | 409 | 835 | 0.49 |
| -20 | 0.051124 | 0.001340 | 0.304712 | 0.007751 | 0.043197 | 0.000368 |  | 256 | 61 | 270 | 6 | 273 | 2 | 101 | 562 | 1029 | 0.55 |
| -21 | 0.048781 | 0.001261 | 0.289374 | 0.007263 | 0.043040 | 0.000367 |  | 200 | 61 | 258 | 6 | 272 | 2 | 105 | 497 | 904 | 0.55 |
| -22 | 0.051228 | 0.001335 | 0.306747 | 0.007773 | 0.043314 | 0.000424 |  | 250 | 59 | 272 | 6 | 273 | 3 | 101 | 805 | 1339 | 0.60 |
|  |  |  |  |  |  |  |  |  |  |  |  |  |  |  |  |  |  |
| Nuergai quartz diorite (14LQ26A) | | | | | | | | | | | | | | | | | |
| -01 | 0.051548 | 0.001922 | 0.302561 | 0.010801 | 0.042808 | 0.000446 |  | 265 | 87 | 268 | 8 | 270 | 3 | 101 | 255 | 401 | 0.63 |
| -02 | 0.052279 | 0.001804 | 0.306960 | 0.009429 | 0.043098 | 0.000395 |  | 298 | 80 | 272 | 7 | 272 | 2 | 100 | 202 | 195 | 1.04 |
| -03 | 0.051777 | 0.003020 | 0.301248 | 0.016486 | 0.043290 | 0.000650 |  | 276 | 133 | 267 | 13 | 273 | 4 | 102 | 110 | 150 | 0.73 |
| -04 | 0.051269 | 0.003062 | 0.299216 | 0.016782 | 0.043203 | 0.000657 |  | 254 | 137 | 266 | 13 | 273 | 4 | 103 | 175 | 149 | 1.17 |
| -05 | 0.052230 | 0.002627 | 0.294924 | 0.013425 | 0.042304 | 0.000517 |  | 295 | 115 | 262 | 11 | 267 | 3 | 102 | 78 | 119 | 0.65 |
| -06 | 0.051149 | 0.001760 | 0.295120 | 0.009384 | 0.042297 | 0.000392 |  | 256 | 80 | 263 | 7 | 267 | 2 | 102 | 135 | 202 | 0.67 |
| -08 | 0.050150 | 0.001620 | 0.294945 | 0.009150 | 0.042807 | 0.000362 |  | 211 | 76 | 262 | 7 | 270 | 2 | 103 | 187 | 318 | 0.59 |
| -09 | 0.051993 | 0.002643 | 0.308145 | 0.015247 | 0.043331 | 0.000664 |  | 283 | 117 | 273 | 12 | 273 | 4 | 100 | 69 | 104 | 0.67 |
| -10 | 0.051541 | 0.001889 | 0.302828 | 0.010651 | 0.042580 | 0.000362 |  | 265 | 79 | 269 | 8 | 269 | 2 | 100 | 169 | 383 | 0.44 |
| -11 | 0.051753 | 0.002787 | 0.309296 | 0.016212 | 0.043275 | 0.000568 |  | 276 | 124 | 274 | 13 | 273 | 4 | 100 | 101 | 190 | 0.53 |
| -12 | 0.051507 | 0.001626 | 0.308896 | 0.009891 | 0.043295 | 0.000377 |  | 265 | 77 | 273 | 8 | 273 | 2 | 100 | 188 | 328 | 0.57 |
| -13 | 0.051458 | 0.003020 | 0.294699 | 0.016082 | 0.042103 | 0.000664 |  | 261 | 135 | 262 | 13 | 266 | 4 | 101 | 138 | 183 | 0.76 |
| -14 | 0.051443 | 0.002317 | 0.299933 | 0.013063 | 0.042292 | 0.000470 |  | 261 | 104 | 266 | 10 | 267 | 3 | 100 | 213 | 177 | 1.20 |
| -15 | 0.052719 | 0.002447 | 0.304069 | 0.013607 | 0.042159 | 0.000516 |  | 317 | 106 | 270 | 11 | 266 | 3 | 99 | 115 | 145 | 0.79 |
| -16 | 0.050621 | 0.001241 | 0.296858 | 0.007379 | 0.042275 | 0.000314 |  | 233 | 57 | 264 | 6 | 267 | 2 | 101 | 298 | 598 | 0.50 |
| -17 | 0.052364 | 0.002345 | 0.304908 | 0.013075 | 0.042476 | 0.000551 |  | 302 | 136 | 270 | 10 | 268 | 3 | 99 | 122 | 141 | 0.86 |
| -18 | 0.051796 | 0.002335 | 0.299751 | 0.013268 | 0.042136 | 0.000473 |  | 276 | 104 | 266 | 10 | 266 | 3 | 100 | 134 | 179 | 0.75 |
| -19 | 0.054884 | 0.003006 | 0.315365 | 0.016452 | 0.042334 | 0.000635 |  | 409 | 122 | 278 | 13 | 267 | 4 | 96 | 91 | 123 | 0.74 |
| -20 | 0.052541 | 0.002880 | 0.307495 | 0.016477 | 0.042544 | 0.000510 |  | 309 | 119 | 272 | 13 | 269 | 3 | 99 | 145 | 223 | 0.65 |
| -21 | 0.051495 | 0.002245 | 0.295736 | 0.011825 | 0.042040 | 0.000478 |  | 265 | 97 | 263 | 9 | 265 | 3 | 101 | 106 | 147 | 0.72 |
| -22 | 0.052711 | 0.001563 | 0.307311 | 0.009047 | 0.042210 | 0.000363 |  | 317 | 64 | 272 | 7 | 267 | 2 | 98 | 174 | 236 | 0.74 |
| -23 | 0.051845 | 0.001749 | 0.307424 | 0.010212 | 0.043048 | 0.000383 |  | 280 | 78 | 272 | 8 | 272 | 2 | 100 | 139 | 197 | 0.70 |
| -24 | 0.051721 | 0.003363 | 0.297160 | 0.018291 | 0.042104 | 0.000646 |  | 272 | 150 | 264 | 14 | 266 | 4 | 101 | 135 | 168 | 0.81 |
| -25 | 0.051383 | 0.001728 | 0.299272 | 0.009874 | 0.042082 | 0.000396 |  | 257 | 78 | 266 | 8 | 266 | 2 | 100 | 196 | 327 | 0.60 |
| Nuergai syenogranite (14LQ30A) | | | | | | | | | | | | | | | | | |
| -01 | 0.051414 | 0.002472 | 0.298748 | 0.014633 | 0.042036 | 0.000546 |  | 261 | 109 | 265 | 11 | 265 | 3 | 100 | 83 | 172 | 0.48 |
| -02 | 0.051711 | 0.002187 | 0.306223 | 0.012240 | 0.043052 | 0.000508 |  | 272 | 98 | 271 | 10 | 272 | 3 | 100 | 286 | 353 | 0.81 |
| -03 | 0.053272 | 0.001532 | 0.312940 | 0.008805 | 0.042483 | 0.000398 |  | 339 | 67 | 276 | 7 | 268 | 2 | 97 | 365 | 528 | 0.69 |
| -04 | 0.052701 | 0.001420 | 0.307978 | 0.008200 | 0.042189 | 0.000315 |  | 317 | 61 | 273 | 6 | 266 | 2 | 98 | 478 | 658 | 0.73 |
| -05 | 0.052794 | 0.001804 | 0.310809 | 0.010221 | 0.043004 | 0.000414 |  | 320 | 78 | 275 | 8 | 271 | 3 | 99 | 249 | 305 | 0.82 |
| -06 | 0.051414 | 0.002300 | 0.305288 | 0.013959 | 0.042831 | 0.000558 |  | 261 | 106 | 271 | 11 | 270 | 3 | 100 | 148 | 217 | 0.68 |
| -07 | 0.054267 | 0.002526 | 0.315352 | 0.013936 | 0.042911 | 0.000586 |  | 383 | 106 | 278 | 11 | 271 | 4 | 97 | 118 | 160 | 0.74 |
| -12 | 0.051776 | 0.002804 | 0.304215 | 0.016075 | 0.042840 | 0.000629 |  | 276 | 124 | 270 | 13 | 270 | 4 | 100 | 70 | 148 | 0.47 |
| -13 | 0.053036 | 0.003111 | 0.308565 | 0.017467 | 0.042747 | 0.000800 |  | 332 | 133 | 273 | 14 | 270 | 5 | 99 | 99 | 149 | 0.66 |
| -14 | 0.055141 | 0.004594 | 0.310763 | 0.025133 | 0.042733 | 0.000943 |  | 417 | 187 | 275 | 19 | 270 | 6 | 98 | 55 | 73 | 0.75 |
| -15 | 0.052287 | 0.001949 | 0.303496 | 0.010912 | 0.042165 | 0.000405 |  | 298 | 90 | 269 | 9 | 266 | 3 | 99 | 241 | 305 | 0.79 |
| -16 | 0.051432 | 0.003137 | 0.294003 | 0.017562 | 0.041589 | 0.000688 |  | 261 | 136 | 262 | 14 | 263 | 4 | 100 | 144 | 184 | 0.79 |
| -17 | 0.052191 | 0.002055 | 0.302517 | 0.011740 | 0.042473 | 0.000480 |  | 295 | 89 | 268 | 9 | 268 | 3 | 100 | 170 | 236 | 0.72 |
| -19 | 0.051793 | 0.001858 | 0.303579 | 0.010634 | 0.042659 | 0.000474 |  | 276 | 88 | 269 | 8 | 269 | 3 | 100 | 193 | 246 | 0.78 |
| -20 | 0.051438 | 0.001688 | 0.302675 | 0.009767 | 0.042704 | 0.000499 |  | 261 | 81 | 268 | 8 | 270 | 3 | 100 | 285 | 397 | 0.72 |
| -21 | 0.051088 | 0.001994 | 0.293786 | 0.010849 | 0.042198 | 0.000425 |  | 256 | 89 | 262 | 9 | 266 | 3 | 102 | 200 | 279 | 0.72 |
| -22 | 0.051425 | 0.002309 | 0.295793 | 0.012333 | 0.042364 | 0.000590 |  | 261 | 104 | 263 | 10 | 267 | 4 | 102 | 255 | 297 | 0.86 |
| -23 | 0.051497 | 0.002768 | 0.294525 | 0.014965 | 0.042697 | 0.000719 |  | 265 | 92 | 262 | 12 | 270 | 4 | 103 | 80 | 139 | 0.58 |
|  |  |  |  |  |  |  |  |  |  |  |  |  |  |  |  |  |  |
| Nuergai syenogranite (14LQ31A) | | | | | | | | | | | | | | | | | |
| -01 | 0.051951 | 0.002261 | 0.303241 | 0.012236 | 0.042853 | 0.000523 |  | 283 | 100 | 269 | 10 | 270 | 3 | 101 | 139 | 233 | 0.60 |
| -03 | 0.051838 | 0.002737 | 0.303187 | 0.014970 | 0.042961 | 0.000721 |  | 280 | 120 | 269 | 12 | 271 | 4 | 101 | 201 | 259 | 0.78 |
| -04 | 0.051556 | 0.002747 | 0.301829 | 0.015819 | 0.042626 | 0.000655 |  | 265 | 122 | 268 | 12 | 269 | 4 | 100 | 134 | 181 | 0.74 |
| -05 | 0.052035 | 0.003737 | 0.305427 | 0.020735 | 0.043166 | 0.000764 |  | 287 | 160 | 271 | 16 | 272 | 5 | 101 | 122 | 186 | 0.66 |
| -06 | 0.051545 | 0.002119 | 0.303909 | 0.013070 | 0.042354 | 0.000559 |  | 265 | 99 | 269 | 10 | 267 | 3 | 99 | 223 | 299 | 0.75 |
| -07 | 0.051506 | 0.002833 | 0.300459 | 0.015362 | 0.042588 | 0.000701 |  | 265 | 126 | 267 | 12 | 269 | 4 | 101 | 43 | 62 | 0.69 |
| -08 | 0.051902 | 0.001424 | 0.308772 | 0.008073 | 0.043141 | 0.000353 |  | 280 | 63 | 273 | 6 | 272 | 2 | 100 | 250 | 339 | 0.74 |
| -09 | 0.051826 | 0.001909 | 0.306808 | 0.010817 | 0.042934 | 0.000519 |  | 276 | 85 | 272 | 8 | 271 | 3 | 100 | 275 | 416 | 0.66 |
| -10 | 0.051557 | 0.001294 | 0.301041 | 0.007327 | 0.042332 | 0.000341 |  | 265 | 59 | 267 | 6 | 267 | 2 | 100 | 254 | 313 | 0.81 |
| -11 | 0.051986 | 0.003002 | 0.300707 | 0.016570 | 0.042304 | 0.000682 |  | 283 | 133 | 267 | 13 | 267 | 4 | 100 | 96 | 177 | 0.54 |
| -12 | 0.050961 | 0.002387 | 0.296291 | 0.013745 | 0.042269 | 0.000450 |  | 239 | 107 | 263 | 11 | 267 | 3 | 101 | 89 | 138 | 0.65 |
| -13 | 0.053405 | 0.002999 | 0.310895 | 0.017035 | 0.042103 | 0.000733 |  | 346 | 132 | 275 | 13 | 266 | 5 | 97 | 66 | 105 | 0.63 |
| -15 | 0.051924 | 0.002903 | 0.297561 | 0.015827 | 0.042408 | 0.000705 |  | 283 | 128 | 264 | 12 | 268 | 4 | 101 | 88 | 92 | 0.95 |
| -16 | 0.051976 | 0.002027 | 0.306886 | 0.011412 | 0.043040 | 0.000448 |  | 283 | 91 | 272 | 9 | 272 | 3 | 100 | 258 | 321 | 0.80 |
| -17 | 0.050416 | 0.001483 | 0.291225 | 0.008444 | 0.042046 | 0.000386 |  | 213 | 67 | 260 | 7 | 266 | 2 | 102 | 147 | 216 | 0.68 |
| -18 | 0.051528 | 0.002278 | 0.297450 | 0.012742 | 0.042078 | 0.000524 |  | 265 | 97 | 264 | 10 | 266 | 3 | 100 | 97 | 134 | 0.73 |
| -19 | 0.051989 | 0.001445 | 0.305285 | 0.008404 | 0.042601 | 0.000318 |  | 283 | 63 | 271 | 7 | 269 | 2 | 99 | 210 | 267 | 0.79 |
| -20 | 0.053080 | 0.002314 | 0.309585 | 0.013575 | 0.042216 | 0.000455 |  | 332 | 98 | 274 | 11 | 267 | 3 | 97 | 161 | 232 | 0.69 |
| -21 | 0.053605 | 0.001740 | 0.312931 | 0.010117 | 0.042291 | 0.000526 |  | 354 | 77 | 276 | 8 | 267 | 3 | 97 | 689 | 950 | 0.73 |
| -22 | 0.051495 | 0.001749 | 0.298779 | 0.010191 | 0.042206 | 0.000549 |  | 265 | 78 | 265 | 8 | 266 | 3 | 100 | 265 | 414 | 0.64 |
|  |  |  |  |  |  |  |  |  |  |  |  |  |  |  |  |  |  |
| Nuergai granodiorite (14LQ33A) | | | | | | | | | | | | | | | | | |
| -01 | 0.052518 | 0.002819 | 0.314674 | 0.016078 | 0.044187 | 0.000691 |  | 309 | 122 | 278 | 12 | 279 | 4 | 100 | 123 | 157 | 0.78 |
| -02 | 0.052017 | 0.002764 | 0.310811 | 0.015407 | 0.044267 | 0.000594 |  | 287 | 150 | 275 | 12 | 279 | 4 | 102 | 89 | 121 | 0.74 |
| -04 | 0.051688 | 0.002543 | 0.322104 | 0.016329 | 0.045132 | 0.000684 |  | 272 | 118 | 284 | 13 | 285 | 4 | 100 | 98 | 158 | 0.62 |
| -06 | 0.051913 | 0.002425 | 0.314155 | 0.014050 | 0.044892 | 0.000626 |  | 283 | 106 | 277 | 11 | 283 | 4 | 102 | 94 | 128 | 0.73 |
| -07 | 0.051708 | 0.002679 | 0.307936 | 0.015156 | 0.044176 | 0.000617 |  | 272 | 119 | 273 | 12 | 279 | 4 | 102 | 88 | 134 | 0.66 |
| -08 | 0.055703 | 0.002677 | 0.344258 | 0.016070 | 0.045121 | 0.000625 |  | 439 | 106 | 300 | 12 | 284 | 4 | 95 | 117 | 166 | 0.71 |
| -09 | 0.052238 | 0.001803 | 0.314224 | 0.010354 | 0.044213 | 0.000558 |  | 295 | 78 | 277 | 8 | 279 | 3 | 101 | 246 | 239 | 1.03 |
| -10 | 0.052214 | 0.002678 | 0.323131 | 0.016118 | 0.045157 | 0.000599 |  | 295 | 119 | 284 | 12 | 285 | 4 | 100 | 96 | 154 | 0.62 |
| -11 | 0.052869 | 0.003565 | 0.321109 | 0.019884 | 0.045299 | 0.000707 |  | 324 | 158 | 283 | 15 | 286 | 4 | 101 | 104 | 162 | 0.64 |
| -12 | 0.051261 | 0.002777 | 0.305752 | 0.015242 | 0.044141 | 0.000548 |  | 254 | 124 | 271 | 12 | 278 | 3 | 103 | 125 | 172 | 0.73 |
| -13 | 0.052628 | 0.003038 | 0.316956 | 0.017338 | 0.044412 | 0.000665 |  | 322 | 131 | 280 | 13 | 280 | 4 | 100 | 98 | 159 | 0.61 |
| -14 | 0.051762 | 0.004046 | 0.308414 | 0.021341 | 0.044188 | 0.000975 |  | 276 | 186 | 273 | 17 | 279 | 6 | 102 | 83 | 130 | 0.64 |
| -15 | 0.052466 | 0.001639 | 0.328606 | 0.010118 | 0.045660 | 0.000430 |  | 306 | 72 | 289 | 8 | 288 | 3 | 100 | 192 | 236 | 0.81 |
| -16 | 0.052071 | 0.004820 | 0.308299 | 0.025473 | 0.044388 | 0.001048 |  | 287 | 213 | 273 | 20 | 280 | 6 | 103 | 137 | 171 | 0.80 |
| -17 | 0.052058 | 0.002388 | 0.307321 | 0.012721 | 0.043697 | 0.000535 |  | 287 | 101 | 272 | 10 | 276 | 3 | 101 | 116 | 168 | 0.69 |
| -19 | 0.050460 | 0.002860 | 0.296108 | 0.015973 | 0.043716 | 0.000745 |  | 217 | 131 | 263 | 13 | 276 | 5 | 105 | 109 | 162 | 0.67 |
| -21 | 0.052439 | 0.003870 | 0.314740 | 0.022157 | 0.044425 | 0.000805 |  | 306 | 168 | 278 | 17 | 280 | 5 | 101 | 90 | 114 | 0.79 |
|  |  |  |  |  |  |  |  |  |  |  |  |  |  |  |  |  |  |
| Oliji granodiorite (14LQ38A) | | | | | | | | | | | | | | | | | |
| -01 | 0.052091 | 0.003378 | 0.265593 | 0.015729 | 0.037741 | 0.000626 |  | 300 | 116 | 239 | 13 | 239 | 4 | 100 | 83 | 156 | 0.53 |
| -02 | 0.051078 | 0.001403 | 0.265202 | 0.007016 | 0.037626 | 0.000324 |  | 243 | 58 | 239 | 6 | 238 | 2 | 100 | 241 | 337 | 0.71 |
| -03 | 0.050780 | 0.003422 | 0.271395 | 0.017150 | 0.039707 | 0.000823 |  | 232 | 156 | 244 | 14 | 251 | 5 | 103 | 159 | 230 | 0.69 |
| -04 | 0.050604 | 0.001563 | 0.264002 | 0.008054 | 0.037658 | 0.000388 |  | 233 | 75 | 238 | 6 | 238 | 2 | 100 | 98 | 161 | 0.61 |
| -05 | 0.050942 | 0.002041 | 0.266774 | 0.010492 | 0.037865 | 0.000433 |  | 239 | 93 | 240 | 8 | 240 | 3 | 100 | 91 | 159 | 0.57 |
| -06 | 0.048733 | 0.001581 | 0.255635 | 0.008202 | 0.037804 | 0.000467 |  | 200 | 76 | 231 | 7 | 239 | 3 | 103 | 128 | 188 | 0.68 |
| -07 | 0.052662 | 0.001452 | 0.277581 | 0.007373 | 0.037861 | 0.000399 |  | 322 | 63 | 249 | 6 | 240 | 2 | 96 | 262 | 333 | 0.79 |
| -08 | 0.052423 | 0.002338 | 0.276705 | 0.011345 | 0.037920 | 0.000486 |  | 306 | 134 | 248 | 9 | 240 | 3 | 97 | 161 | 273 | 0.59 |
| -09 | 0.052872 | 0.002540 | 0.278310 | 0.012320 | 0.038389 | 0.000608 |  | 324 | 109 | 249 | 10 | 243 | 4 | 97 | 107 | 141 | 0.76 |
| -10 | 0.051205 | 0.002115 | 0.272269 | 0.010624 | 0.038477 | 0.000613 |  | 250 | 94 | 245 | 8 | 243 | 4 | 100 | 112 | 171 | 0.65 |
| -11 | 0.051561 | 0.002814 | 0.270067 | 0.013766 | 0.038302 | 0.000649 |  | 265 | 94 | 243 | 11 | 242 | 4 | 100 | 130 | 217 | 0.60 |
| -12 | 0.047244 | 0.001722 | 0.251204 | 0.009130 | 0.038518 | 0.000384 |  | 61 | 85 | 228 | 7 | 244 | 2 | 107 | 115 | 198 | 0.58 |
| -13 | 0.051366 | 0.001240 | 0.266667 | 0.006110 | 0.037526 | 0.000299 |  | 257 | 56 | 240 | 5 | 237 | 2 | 99 | 361 | 458 | 0.79 |
| -15 | 0.051021 | 0.002231 | 0.267794 | 0.011071 | 0.038326 | 0.000439 |  | 243 | 69 | 241 | 9 | 242 | 3 | 101 | 166 | 199 | 0.83 |
| -16 | 0.051053 | 0.002088 | 0.267814 | 0.010543 | 0.038147 | 0.000412 |  | 243 | 99 | 241 | 8 | 241 | 3 | 100 | 108 | 182 | 0.59 |
| -17 | 0.051145 | 0.001959 | 0.269610 | 0.010059 | 0.038456 | 0.000421 |  | 256 | 82 | 242 | 8 | 243 | 3 | 100 | 115 | 186 | 0.62 |
| -18 | 0.051403 | 0.002398 | 0.271612 | 0.012077 | 0.038800 | 0.000462 |  | 257 | 107 | 244 | 10 | 245 | 3 | 101 | 85 | 149 | 0.57 |
| -19 | 0.050928 | 0.001440 | 0.269436 | 0.007459 | 0.038258 | 0.000257 |  | 239 | 65 | 242 | 6 | 242 | 2 | 100 | 250 | 340 | 0.74 |
| -20 | 0.051314 | 0.002717 | 0.266474 | 0.013454 | 0.037734 | 0.000614 |  | 254 | 122 | 240 | 11 | 239 | 4 | 100 | 100 | 190 | 0.52 |
| -21 | 0.053020 | 0.002154 | 0.277109 | 0.011081 | 0.037857 | 0.000405 |  | 328 | 93 | 248 | 9 | 240 | 3 | 96 | 146 | 195 | 0.75 |
| -22 | 0.052893 | 0.001589 | 0.279391 | 0.007967 | 0.038336 | 0.000338 |  | 324 | 69 | 250 | 6 | 243 | 2 | 97 | 215 | 309 | 0.70 |
|  |  |  |  |  |  |  |  |  |  |  |  |  |  |  |  |  |  |
| Oliji monzogranite (14LQ44A) | | | | | | | | | | | | | | | | | |
| -01 | 0.051183 | 0.001755 | 0.280957 | 0.009766 | 0.039719 | 0.000390 |  | 250 | 80 | 251 | 8 | 251 | 2 | 100 | 265 | 368 | 0.72 |
| -03 | 0.051088 | 0.001990 | 0.267776 | 0.009954 | 0.038625 | 0.000401 |  | 256 | 89 | 241 | 8 | 244 | 2 | 101 | 29 | 271 | 0.11 |
| -04 | 0.051070 | 0.001756 | 0.266670 | 0.008944 | 0.038092 | 0.000370 |  | 243 | 80 | 240 | 7 | 241 | 2 | 100 | 135 | 179 | 0.75 |
| -05 | 0.051345 | 0.001194 | 0.269030 | 0.005890 | 0.038023 | 0.000282 |  | 257 | 49 | 242 | 5 | 241 | 2 | 99 | 221 | 504 | 0.44 |
| -06 | 0.051150 | 0.002460 | 0.275721 | 0.013219 | 0.038969 | 0.000468 |  | 256 | 111 | 247 | 11 | 246 | 3 | 100 | 132 | 238 | 0.55 |
| -07 | 0.048757 | 0.001576 | 0.285629 | 0.009021 | 0.042607 | 0.000391 |  | 200 | 76 | 255 | 7 | 269 | 2 | 105 | 116 | 178 | 0.65 |
| -09 | 0.051256 | 0.001476 | 0.271258 | 0.007454 | 0.038535 | 0.000350 |  | 254 | 67 | 244 | 6 | 244 | 2 | 100 | 249 | 226 | 1.10 |
| -10 | 0.051272 | 0.001412 | 0.272884 | 0.007325 | 0.038642 | 0.000313 |  | 254 | 68 | 245 | 6 | 244 | 2 | 100 | 249 | 360 | 0.69 |
| -11 | 0.051939 | 0.001289 | 0.271370 | 0.006834 | 0.037722 | 0.000310 |  | 283 | 53 | 244 | 5 | 239 | 2 | 98 | 676 | 511 | 1.32 |
| -12 | 0.050627 | 0.001218 | 0.263756 | 0.006235 | 0.037714 | 0.000289 |  | 233 | 56 | 238 | 5 | 239 | 2 | 100 | 325 | 452 | 0.72 |
| -13 | 0.051339 | 0.001703 | 0.283948 | 0.009053 | 0.040528 | 0.000391 |  | 257 | 71 | 254 | 7 | 256 | 2 | 101 | 111 | 236 | 0.47 |
| -14 | 0.053371 | 0.002028 | 0.277006 | 0.010633 | 0.037615 | 0.000480 |  | 346 | 85 | 248 | 8 | 238 | 3 | 96 | 194 | 354 | 0.55 |
| -15 | 0.051031 | 0.002475 | 0.266502 | 0.012048 | 0.038490 | 0.000479 |  | 243 | 111 | 240 | 10 | 243 | 3 | 101 | 65 | 145 | 0.45 |
| -16 | 0.052184 | 0.001426 | 0.278382 | 0.007328 | 0.038763 | 0.000307 |  | 295 | 61 | 249 | 6 | 245 | 2 | 98 | 674 | 632 | 1.07 |
| -17 | 0.048720 | 0.001268 | 0.256776 | 0.006445 | 0.038365 | 0.000310 |  | 200 | 61 | 232 | 5 | 243 | 2 | 105 | 734 | 565 | 1.30 |
| -18 | 0.051684 | 0.003056 | 0.304230 | 0.017650 | 0.043003 | 0.000672 |  | 272 | 168 | 270 | 14 | 271 | 4 | 101 | 99 | 195 | 0.51 |
| -19 | 0.051200 | 0.003101 | 0.272997 | 0.016900 | 0.038797 | 0.000756 |  | 250 | 139 | 245 | 13 | 245 | 5 | 100 | 181 | 313 | 0.58 |
| -20 | 0.051268 | 0.002347 | 0.274518 | 0.012524 | 0.038803 | 0.000494 |  | 254 | 106 | 246 | 10 | 245 | 3 | 100 | 235 | 258 | 0.91 |
| -21 | 0.051241 | 0.001780 | 0.272377 | 0.008949 | 0.038800 | 0.000438 |  | 250 | 81 | 245 | 7 | 245 | 3 | 100 | 158 | 409 | 0.39 |
| -22 | 0.051349 | 0.001527 | 0.268814 | 0.007641 | 0.037910 | 0.000392 |  | 257 | 69 | 242 | 6 | 240 | 2 | 99 | 370 | 764 | 0.48 |

tABLE DR2. Zircon Hf-isotope compositions

| Dot# | 176Hf/177Hf | 2σ | 176Lu/177Hf | 2σ | 176Yb/177Hf | 2σ | Age | TDM | TCDM | (176Hf/177Hf)i | Hf(t) |
| --- | --- | --- | --- | --- | --- | --- | --- | --- | --- | --- | --- |
| (Ma) | (Ga) | (Ga) |
| Bayan Nuru monzogranite (14LQ01A) | | | | | | | | | | | |
| -01 | 0.282460 | 0.000014 | 0.000972 | 0.000005 | 0.025791 | 0.000166 | 272 | 1.12 | 1.62 | 0.282455 | -5.2 |
| -04 | 0.282468 | 0.000015 | 0.000817 | 0.000006 | 0.020416 | 0.000174 | 267 | 1.11 | 1.61 | 0.282464 | -5.0 |
| -05 | 0.282486 | 0.000014 | 0.000837 | 0.000014 | 0.021390 | 0.000317 | 271 | 1.08 | 1.56 | 0.282481 | -4.3 |
| -08 | 0.282477 | 0.000014 | 0.001403 | 0.000042 | 0.036953 | 0.001094 | 268 | 1.11 | 1.59 | 0.282470 | -4.8 |
| -12 | 0.282493 | 0.000017 | 0.000992 | 0.000004 | 0.024716 | 0.000106 | 266 | 1.08 | 1.55 | 0.282488 | -4.2 |
| -13 | 0.282464 | 0.000014 | 0.000647 | 0.000003 | 0.016476 | 0.000127 | 264 | 1.11 | 1.61 | 0.282461 | -5.2 |
| -14 | 0.282477 | 0.000014 | 0.000842 | 0.000004 | 0.021480 | 0.000100 | 264 | 1.09 | 1.59 | 0.282473 | -4.8 |
| -15 | 0.282493 | 0.000016 | 0.000964 | 0.000006 | 0.024228 | 0.000158 | 268 | 1.08 | 1.55 | 0.282488 | -4.2 |
| -16 | 0.282497 | 0.000014 | 0.001316 | 0.000005 | 0.032923 | 0.000084 | 268 | 1.08 | 1.55 | 0.282491 | -4.1 |
| -18 | 0.282492 | 0.000013 | 0.000665 | 0.000009 | 0.016924 | 0.000230 | 268 | 1.07 | 1.55 | 0.282489 | -4.1 |
| -19 | 0.282441 | 0.000015 | 0.001242 | 0.000011 | 0.032072 | 0.000301 | 268 | 1.16 | 1.67 | 0.282435 | -6.0 |
| -20 | 0.282520 | 0.000015 | 0.000919 | 0.000003 | 0.023395 | 0.000064 | 266 | 1.04 | 1.49 | 0.282515 | -3.2 |
|  |  |  |  |  |  |  |  |  |  |  |  |
| Bayan Nuru syenogranite (14LQ14A) | | | | | | | | | | | |
| -01 | 0.282311 | 0.000014 | 0.001939 | 0.000012 | 0.055297 | 0.000352 | 276 | 1.37 | 1.96 | 0.282301 | -10.6 |
| -04 | 0.282291 | 0.000013 | 0.001196 | 0.000013 | 0.032209 | 0.000495 | 277 | 1.37 | 2.00 | 0.282285 | -11.2 |
| -05 | 0.282339 | 0.000015 | 0.002049 | 0.000032 | 0.056777 | 0.001144 | 284 | 1.33 | 1.90 | 0.282328 | -9.5 |
| -06 | 0.282328 | 0.000013 | 0.001228 | 0.000015 | 0.033927 | 0.000372 | 281 | 1.32 | 1.91 | 0.282322 | -9.8 |
| -07 | 0.282322 | 0.000016 | 0.001321 | 0.000055 | 0.036843 | 0.001634 | 281 | 1.33 | 1.93 | 0.282315 | -10.0 |
| -09 | 0.282299 | 0.000014 | 0.001398 | 0.000031 | 0.038437 | 0.000824 | 272 | 1.36 | 1.98 | 0.282292 | -11.0 |
| -10 | 0.282283 | 0.000014 | 0.001584 | 0.000024 | 0.043403 | 0.000833 | 276 | 1.39 | 2.02 | 0.282275 | -11.5 |
| -11 | 0.282321 | 0.000015 | 0.001287 | 0.000027 | 0.034991 | 0.000826 | 284 | 1.33 | 1.93 | 0.282314 | -10.0 |
| -15 | 0.282319 | 0.000015 | 0.001310 | 0.000010 | 0.034711 | 0.000267 | 282 | 1.33 | 1.93 | 0.282312 | -10.1 |
| -16 | 0.282303 | 0.000014 | 0.001653 | 0.000009 | 0.047465 | 0.000304 | 284 | 1.37 | 1.97 | 0.282294 | -10.7 |
| -18 | 0.282284 | 0.000014 | 0.001606 | 0.000018 | 0.043941 | 0.000642 | 283 | 1.39 | 2.01 | 0.282276 | -11.3 |
|  |  |  |  |  |  |  |  |  |  |  |  |
| Yabulai granodiorite (14LQ34A) | | | | | | | | | | | |
| -01 | 0.282520 | 0.000013 | 0.000895 | 0.000007 | 0.023282 | 0.000179 | 276 | 1.03 | 1.49 | 0.282515 | -3.0 |
| -03 | 0.282494 | 0.000016 | 0.001662 | 0.000019 | 0.043526 | 0.000633 | 277 | 1.09 | 1.55 | 0.282485 | -4.1 |
| -07 | 0.282466 | 0.000017 | 0.001769 | 0.000009 | 0.049128 | 0.000235 | 277 | 1.14 | 1.62 | 0.282456 | -5.1 |
| -08 | 0.282471 | 0.000016 | 0.001253 | 0.000008 | 0.033828 | 0.000265 | 280 | 1.11 | 1.60 | 0.282464 | -4.7 |
| -09 | 0.282491 | 0.000015 | 0.001649 | 0.000024 | 0.045031 | 0.000925 | 275 | 1.10 | 1.56 | 0.282483 | -4.2 |
| -10 | 0.282498 | 0.000019 | 0.002063 | 0.000023 | 0.057452 | 0.000739 | 275 | 1.10 | 1.55 | 0.282487 | -4.0 |
| -11 | 0.282506 | 0.000016 | 0.001336 | 0.000017 | 0.034345 | 0.000401 | 275 | 1.07 | 1.52 | 0.282499 | -3.6 |
| -12 | 0.282464 | 0.000015 | 0.001486 | 0.000018 | 0.039511 | 0.000481 | 275 | 1.13 | 1.62 | 0.282456 | -5.1 |
| -14 | 0.282464 | 0.000014 | 0.001445 | 0.000012 | 0.038381 | 0.000322 | 275 | 1.13 | 1.62 | 0.282457 | -5.1 |
| -15 | 0.282453 | 0.000013 | 0.001155 | 0.000023 | 0.030946 | 0.000672 | 280 | 1.14 | 1.63 | 0.282447 | -5.3 |
| -18 | 0.282473 | 0.000014 | 0.001352 | 0.000009 | 0.038316 | 0.000233 | 280 | 1.11 | 1.59 | 0.282466 | -4.7 |
| -19 | 0.282513 | 0.000018 | 0.001692 | 0.000012 | 0.046074 | 0.000375 | 275 | 1.07 | 1.51 | 0.282505 | -3.4 |
|  |  |  |  |  |  |  |  |  |  |  |  |
| Yabulai granodiorite (14LQ35A) | | | | | | | | | | | |
| -01 | 0.282429 | 0.000014 | 0.000994 | 0.000006 | 0.024836 | 0.000176 | 271 | 1.16 | 1.69 | 0.282424 | -6.3 |
| -02 | 0.282416 | 0.000013 | 0.001184 | 0.000009 | 0.029807 | 0.000239 | 271 | 1.19 | 1.72 | 0.282410 | -6.8 |
| -03 | 0.282408 | 0.000015 | 0.001210 | 0.000041 | 0.032782 | 0.001077 | 273 | 1.20 | 1.74 | 0.282401 | -7.1 |
| -04 | 0.282417 | 0.000011 | 0.000669 | 0.000006 | 0.016126 | 0.000139 | 266 | 1.17 | 1.72 | 0.282413 | -6.9 |
| -15 | 0.282455 | 0.000013 | 0.001446 | 0.000013 | 0.035737 | 0.000331 | 271 | 1.14 | 1.64 | 0.282448 | -5.5 |
| -16 | 0.282406 | 0.000013 | 0.001001 | 0.000007 | 0.024867 | 0.000198 | 266 | 1.20 | 1.75 | 0.282401 | -7.3 |
| -17 | 0.282403 | 0.000011 | 0.000829 | 0.000002 | 0.019064 | 0.000062 | 270 | 1.20 | 1.75 | 0.282399 | -7.3 |
| -18 | 0.282424 | 0.000013 | 0.000991 | 0.000008 | 0.023863 | 0.000270 | 271 | 1.17 | 1.70 | 0.282419 | -6.6 |
| -19 | 0.282415 | 0.000012 | 0.001140 | 0.000002 | 0.027860 | 0.000070 | 265 | 1.19 | 1.73 | 0.282409 | -7.0 |
| -20 | 0.282401 | 0.000014 | 0.001207 | 0.000007 | 0.029471 | 0.000133 | 273 | 1.21 | 1.76 | 0.282395 | -7.4 |
| -21 | 0.282437 | 0.000015 | 0.001261 | 0.000010 | 0.032350 | 0.000294 | 272 | 1.16 | 1.68 | 0.282431 | -6.1 |
|  |  |  |  |  |  |  |  |  |  |  |  |
| Nuergai quartz diorite (14LQ26A) | | | | | | | | | | | |
| -02 | 0.282677 | 0.000015 | 0.000739 | 0.000019 | 0.019650 | 0.000551 | 272 | 0.81 | 1.13 | 0.282673 | 2.5 |
| -03 | 0.282699 | 0.000013 | 0.000684 | 0.000006 | 0.018126 | 0.000169 | 273 | 0.78 | 1.08 | 0.282696 | 3.3 |
| -08 | 0.282680 | 0.000011 | 0.000561 | 0.000001 | 0.014149 | 0.000051 | 270 | 0.80 | 1.13 | 0.282677 | 2.6 |
| -09 | 0.282666 | 0.000015 | 0.000545 | 0.000002 | 0.013886 | 0.000066 | 273 | 0.82 | 1.16 | 0.282664 | 2.2 |
| -15 | 0.282675 | 0.000014 | 0.000457 | 0.000001 | 0.011722 | 0.000049 | 266 | 0.81 | 1.14 | 0.282672 | 2.3 |
| -16 | 0.282655 | 0.000015 | 0.000487 | 0.000002 | 0.012155 | 0.000054 | 267 | 0.84 | 1.18 | 0.282652 | 1.6 |
| -17 | 0.282663 | 0.000014 | 0.000791 | 0.000006 | 0.021539 | 0.000169 | 268 | 0.83 | 1.17 | 0.282659 | 1.9 |
| -18 | 0.282679 | 0.000013 | 0.000474 | 0.000004 | 0.012181 | 0.000120 | 266 | 0.80 | 1.13 | 0.282676 | 2.5 |
| -19 | 0.282671 | 0.000014 | 0.000411 | 0.000003 | 0.010672 | 0.000056 | 267 | 0.81 | 1.15 | 0.282669 | 2.2 |
| -21 | 0.282674 | 0.000015 | 0.000481 | 0.000006 | 0.012469 | 0.000188 | 265 | 0.81 | 1.14 | 0.282672 | 2.3 |
| -22 | 0.282668 | 0.000013 | 0.000510 | 0.000005 | 0.013164 | 0.000156 | 267 | 0.82 | 1.15 | 0.282666 | 2.1 |
| -24 | 0.282681 | 0.000013 | 0.000579 | 0.000002 | 0.015099 | 0.000072 | 266 | 0.80 | 1.13 | 0.282678 | 2.5 |
|  |  |  |  |  |  |  |  |  |  |  |  |
| Nuergai syenogranite (14LQ30A) | | | | | | | | | | | |
| -01 | 0.282741 | 0.000014 | 0.000746 | 0.000002 | 0.020500 | 0.000091 | 265 | 0.72 | 0.99 | 0.282738 | 4.6 |
| -02 | 0.282752 | 0.000014 | 0.000983 | 0.000006 | 0.026831 | 0.000142 | 272 | 0.71 | 0.97 | 0.282747 | 5.1 |
| -04 | 0.282737 | 0.000013 | 0.001110 | 0.000002 | 0.030988 | 0.000115 | 268 | 0.73 | 1.01 | 0.282731 | 4.4 |
| -06 | 0.282742 | 0.000014 | 0.001049 | 0.000003 | 0.029285 | 0.000064 | 266 | 0.73 | 1.00 | 0.282737 | 4.6 |
| -07 | 0.282744 | 0.000016 | 0.000829 | 0.000005 | 0.022737 | 0.000201 | 271 | 0.72 | 0.99 | 0.282739 | 4.8 |
| -12 | 0.282732 | 0.000017 | 0.001470 | 0.000003 | 0.041643 | 0.000109 | 270 | 0.75 | 1.02 | 0.282725 | 4.3 |
| -13 | 0.282739 | 0.000014 | 0.000934 | 0.000003 | 0.026278 | 0.000157 | 270 | 0.73 | 1.00 | 0.282735 | 4.6 |
| -14 | 0.282790 | 0.000019 | 0.001095 | 0.000005 | 0.029714 | 0.000133 | 270 | 0.66 | 0.89 | 0.282785 | 6.4 |
| -15 | 0.282759 | 0.000012 | 0.000929 | 0.000001 | 0.024976 | 0.000044 | 266 | 0.70 | 0.96 | 0.282755 | 5.2 |
| -16 | 0.282768 | 0.000020 | 0.001431 | 0.000009 | 0.039715 | 0.000263 | 263 | 0.70 | 0.94 | 0.282761 | 5.4 |
| -22 | 0.282750 | 0.000017 | 0.002011 | 0.000028 | 0.057073 | 0.000922 | 267 | 0.73 | 0.99 | 0.282740 | 4.7 |
| -23 | 0.282764 | 0.000019 | 0.000672 | 0.000006 | 0.017542 | 0.000140 | 270 | 0.69 | 0.94 | 0.282761 | 5.5 |
|  |  |  |  |  |  |  |  |  |  |  |  |
| Nuergai syenogranite (14LQ31A) | | | | | | | | | | | |
| -01 | 0.282725 | 0.000016 | 0.001468 | 0.000021 | 0.045972 | 0.000862 | 270 | 0.76 | 1.04 | 0.282718 | 4.0 |
| -02 | 0.282724 | 0.000013 | 0.000800 | 0.000001 | 0.022766 | 0.000017 | 269 | 0.75 | 1.03 | 0.282720 | 4.1 |
| -03 | 0.282744 | 0.000013 | 0.000834 | 0.000004 | 0.023303 | 0.000074 | 271 | 0.72 | 0.98 | 0.282740 | 4.8 |
| -06 | 0.282722 | 0.000014 | 0.000872 | 0.000002 | 0.024303 | 0.000037 | 267 | 0.75 | 1.04 | 0.282718 | 4.0 |
| -07 | 0.282686 | 0.000019 | 0.001199 | 0.000021 | 0.032882 | 0.000528 | 269 | 0.81 | 1.12 | 0.282680 | 2.6 |
| -08 | 0.282724 | 0.000014 | 0.000977 | 0.000008 | 0.028002 | 0.000336 | 272 | 0.75 | 1.03 | 0.282719 | 4.1 |
| -09 | 0.282714 | 0.000013 | 0.000899 | 0.000006 | 0.025436 | 0.000150 | 271 | 0.76 | 1.05 | 0.282709 | 3.7 |
| -10 | 0.282761 | 0.000015 | 0.000903 | 0.000002 | 0.025007 | 0.000097 | 267 | 0.70 | 0.95 | 0.282757 | 5.3 |
| -12 | 0.282742 | 0.000018 | 0.001091 | 0.000009 | 0.030860 | 0.000217 | 267 | 0.73 | 1.00 | 0.282737 | 4.6 |
| -13 | 0.282761 | 0.000019 | 0.000996 | 0.000010 | 0.027920 | 0.000259 | 266 | 0.70 | 0.95 | 0.282756 | 5.3 |
| -17 | 0.282719 | 0.000015 | 0.000894 | 0.000005 | 0.026201 | 0.000263 | 266 | 0.76 | 1.05 | 0.282715 | 3.8 |
| -22 | 0.282712 | 0.000015 | 0.000906 | 0.000002 | 0.025374 | 0.000060 | 266 | 0.76 | 1.06 | 0.282708 | 3.6 |
|  |  |  |  |  |  |  |  |  |  |  |  |
| Nuergai granodiorite (14LQ33A) | | | | | | | | | | | |
| -01 | 0.282712 | 0.000017 | 0.001114 | 0.000038 | 0.026529 | 0.000955 | 279 | 0.77 | 1.06 | 0.282706 | 3.8 |
| -03 | 0.282655 | 0.000014 | 0.000536 | 0.000012 | 0.012395 | 0.000308 | 281 | 0.84 | 1.18 | 0.282652 | 1.9 |
| -07 | 0.282666 | 0.000016 | 0.001041 | 0.000008 | 0.024011 | 0.000153 | 279 | 0.83 | 1.16 | 0.282660 | 2.2 |
| -10 | 0.282657 | 0.000014 | 0.000675 | 0.000017 | 0.015013 | 0.000345 | 285 | 0.84 | 1.17 | 0.282653 | 2.1 |
| -11 | 0.282652 | 0.000015 | 0.000915 | 0.000013 | 0.020621 | 0.000278 | 286 | 0.85 | 1.19 | 0.282647 | 1.8 |
| -12 | 0.282709 | 0.000017 | 0.000852 | 0.000007 | 0.019434 | 0.000127 | 278 | 0.77 | 1.06 | 0.282705 | 3.7 |
| -15 | 0.282669 | 0.000015 | 0.000592 | 0.000014 | 0.013067 | 0.000314 | 288 | 0.82 | 1.14 | 0.282666 | 2.6 |
| -16 | 0.282662 | 0.000015 | 0.000987 | 0.000004 | 0.022637 | 0.000101 | 280 | 0.84 | 1.17 | 0.282657 | 2.1 |
| -19 | 0.282679 | 0.000014 | 0.000897 | 0.000014 | 0.020363 | 0.000342 | 276 | 0.81 | 1.13 | 0.282675 | 2.6 |
| -20 | 0.282677 | 0.000015 | 0.000833 | 0.000007 | 0.018657 | 0.000135 | 281 | 0.81 | 1.13 | 0.282673 | 2.7 |
| -21 | 0.282648 | 0.000015 | 0.000744 | 0.000008 | 0.017525 | 0.000198 | 280 | 0.85 | 1.20 | 0.282644 | 1.6 |
|  |  |  |  |  |  |  |  |  |  |  |  |
| Oliji granodiorite (14LQ38A) | | | | | | | | | | | |
| -05 | 0.282863 | 0.000015 | 0.000646 | 0.000002 | 0.016256 | 0.000049 | 240 | 0.55 | 0.73 | 0.282860 | 8.4 |
| -10 | 0.282865 | 0.000016 | 0.000910 | 0.000006 | 0.024453 | 0.000180 | 243 | 0.55 | 0.73 | 0.282861 | 8.5 |
| -11 | 0.282884 | 0.000016 | 0.000926 | 0.000007 | 0.024799 | 0.000135 | 242 | 0.52 | 0.69 | 0.282880 | 9.1 |
| -12 | 0.282867 | 0.000017 | 0.000876 | 0.000006 | 0.022864 | 0.000139 | 244 | 0.55 | 0.73 | 0.282863 | 8.6 |
| -13 | 0.282860 | 0.000015 | 0.000927 | 0.000019 | 0.024656 | 0.000536 | 237 | 0.56 | 0.75 | 0.282856 | 8.2 |
| -14 | 0.282907 | 0.000014 | 0.000713 | 0.000013 | 0.018252 | 0.000361 | 241 | 0.49 | 0.63 | 0.282904 | 10.0 |
| -15 | 0.282892 | 0.000017 | 0.001146 | 0.000034 | 0.031114 | 0.000943 | 242 | 0.51 | 0.67 | 0.282887 | 9.4 |
| -16 | 0.282874 | 0.000016 | 0.000830 | 0.000005 | 0.021353 | 0.000113 | 241 | 0.54 | 0.71 | 0.282870 | 8.8 |
| -17 | 0.282951 | 0.000016 | 0.001061 | 0.000010 | 0.027498 | 0.000251 | 243 | 0.43 | 0.54 | 0.282946 | 11.5 |
| -18 | 0.282875 | 0.000016 | 0.000796 | 0.000015 | 0.020469 | 0.000379 | 245 | 0.53 | 0.70 | 0.282872 | 8.9 |
| -19 | 0.282857 | 0.000015 | 0.000879 | 0.000016 | 0.023331 | 0.000521 | 242 | 0.56 | 0.75 | 0.282853 | 8.2 |
| -20 | 0.282878 | 0.000017 | 0.000569 | 0.000011 | 0.014397 | 0.000293 | 239 | 0.53 | 0.70 | 0.282876 | 8.9 |
|  |  |  |  |  |  |  |  |  |  |  |  |
| Oliji monzogranite (14LQ44A) | | | | | | | | | | | |
| -03 | 0.282774 | 0.000014 | 0.000779 | 0.000011 | 0.019144 | 0.000358 | 244 | 0.68 | 0.93 | 0.282770 | 5.3 |
| -04 | 0.282600 | 0.000014 | 0.000412 | 0.000006 | 0.011291 | 0.000216 | 241 | 0.91 | 1.32 | 0.282599 | -0.8 |
| -06 | 0.282822 | 0.000014 | 0.000569 | 0.000002 | 0.013644 | 0.000075 | 246 | 0.60 | 0.82 | 0.282819 | 7.1 |
| -07 | 0.282825 | 0.000014 | 0.000530 | 0.000001 | 0.015177 | 0.000040 | 269 | 0.60 | 0.80 | 0.282823 | 7.7 |
| -08 | 0.282645 | 0.000006 | 0.000000 | 0.000000 | 0.000009 | 0.000001 | 242 | 0.84 | 1.22 | 0.282645 | 0.8 |
| -09 | 0.282799 | 0.000016 | 0.000663 | 0.000012 | 0.017359 | 0.000352 | 244 | 0.64 | 0.88 | 0.282796 | 6.2 |
| -11 | 0.282607 | 0.000017 | 0.001375 | 0.000016 | 0.037634 | 0.000447 | 239 | 0.92 | 1.32 | 0.282601 | -0.8 |
| -12 | 0.282760 | 0.000013 | 0.000647 | 0.000023 | 0.016777 | 0.000626 | 239 | 0.69 | 0.97 | 0.282757 | 4.7 |
| -13 | 0.282786 | 0.000017 | 0.000549 | 0.000006 | 0.013417 | 0.000157 | 256 | 0.65 | 0.90 | 0.282784 | 6.0 |
| -14 | 0.282801 | 0.000016 | 0.001045 | 0.000017 | 0.028156 | 0.000483 | 238 | 0.64 | 0.88 | 0.282796 | 6.1 |
| -15 | 0.282793 | 0.000018 | 0.000735 | 0.000013 | 0.017739 | 0.000286 | 243 | 0.65 | 0.89 | 0.282790 | 6.0 |
| -16 | 0.282837 | 0.000018 | 0.001775 | 0.000014 | 0.048571 | 0.000533 | 245 | 0.60 | 0.80 | 0.282829 | 7.4 |
| -18 | 0.282754 | 0.000018 | 0.001724 | 0.000023 | 0.045733 | 0.000669 | 271 | 0.72 | 0.97 | 0.282745 | 5.0 |
| -19 | 0.282829 | 0.000019 | 0.001459 | 0.000002 | 0.039985 | 0.000107 | 245 | 0.61 | 0.82 | 0.282822 | 7.2 |
| -21 | 0.282791 | 0.000015 | 0.000921 | 0.000011 | 0.025524 | 0.000434 | 245 | 0.65 | 0.90 | 0.282787 | 5.9 |
| *Note:* Ages are measured zircon U-Pb ages in this study.  TDM = 1/λ×ln(1+((176Hf/177Hf)S-(176Hf/177Hf)DM))/((176Lu/177Hf)S-(176Lu/177Hf)DM)). S–Sample, DM–depleted mantle, t–Measured zircon U-Pb ages. λ = 1.865×10-11 a-1. The (176Hf/177Hf)DM and (176Lu/177Hf)DM at present are 0.283251 and 0.0384, respectively.  TCDM = 1/λ×ln(1+((176Hf/177Hf)S-(176Hf/177Hf)DM))/((176Lu/177Hf)C-(176Lu/177Hf)DM))+t. C–Crust. (176Lu/177Hf)C = 0.015.  (176Hf/177Hf)i = (176Hf/177Hf)S-(176Lu/177Hf)S(eλt-1).  Hf(t) = 10000×(((176Hf/177Hf)S-(176Lu/177Hf)S×(eλt-1))/(176Hf/177Hf)CHUR-(176Lu/177Hf)CHUR×(eλt-1))-1). CHUR–Chondrite. The (176Hf/177Hf)CHUR and (176Lu/177Hf)CHUR at present are 0.282772 and 0.0332, respectively. | | | | | | | | | | | |

tABLE DR3. Whole-rock major- (wt%) and trace-element (ppm) compositions

| Samples | 14LQ01A | 14LQ01B | 14LQ01C | 14LQ14A | 14LQ14B | 14LQ34A | 14LQ34F | 14LQ35A | 14LQ35C | 14LQ26A | 14LQ26B | 14LQ26D | 14LQ30A |
| --- | --- | --- | --- | --- | --- | --- | --- | --- | --- | --- | --- | --- | --- |
| SiO2 | 72.30 | 70.83 | 71.25 | 76.12 | 76.20 | 68.30 | 73.15 | 70.44 | 67.34 | 56.09 | 56.38 | 54.96 | 76.80 |
| TiO2 | 0.32 | 0.34 | 0.30 | 0.10 | 0.10 | 0.58 | 0.20 | 0.35 | 0.45 | 0.92 | 0.90 | 0.92 | 0.17 |
| Al2O3 | 14.62 | 13.95 | 13.96 | 13.09 | 13.31 | 15.20 | 13.90 | 13.94 | 16.26 | 17.64 | 17.72 | 18.41 | 12.14 |
| Fe2O3t | 2.34 | 2.86 | 2.51 | 0.13 | N.A. | 4.36 | 1.64 | 3.52 | 4.27 | 8.42 | 7.80 | 8.19 | 1.27 |
| MnO | 0.056 | 0.061 | 0.055 | N.A. | 0.001 | 0.100 | 0.058 | 0.066 | 0.082 | 0.149 | 0.145 | 0.152 | 0.032 |
| MgO | 0.64 | 0.58 | 0.52 | 0.13 | 0.1 | 1.28 | 0.39 | 1.09 | 1.47 | 3.63 | 3.6 | 3.81 | 0.24 |
| CaO | 1.81 | 1.84 | 1.81 | 0.95 | 1.01 | 3.34 | 1.73 | 3.05 | 3.74 | 7.35 | 7.15 | 7.55 | 0.92 |
| Na2O | 4.03 | 3.81 | 4.02 | 3.34 | 3.45 | 3.75 | 3.82 | 3.52 | 4.37 | 3.21 | 3.2 | 3.39 | 3.47 |
| K2O | 4.34 | 4.34 | 4.19 | 5.2 | 5.1 | 3.12 | 3.92 | 2.54 | 1.93 | 1.58 | 1.68 | 1.77 | 4.59 |
| P2O5 | 0.055 | 0.095 | 0.080 | 0.043 | 0.041 | 0.128 | 0.049 | 0.094 | 0.102 | 0.164 | 0.180 | 0.193 | 0.024 |
| LOI | -0.20 | 0.39 | 0.80 | 0.79 | 0.38 | 0.20 | 0.40 | 0.39 | -0.20 | 0.20 | 0.58 | -0.20 | 0.00 |
| TOTAL | 100.31 | 99.09 | 99.50 | 99.89 | 99.63 | 100.36 | 99.25 | 99.00 | 99.81 | 99.36 | 99.33 | 99.10 | 99.66 |
| A/CNK | 1.00 | 0.97 | 0.97 | 1.02 | 1.02 | 0.97 | 1.02 | 0.99 | 1.01 | 0.87 | 0.88 | 0.87 | 0.98 |
| A/NK | 1.29 | 1.27 | 1.25 | 1.18 | 1.19 | 1.59 | 1.32 | 1.63 | 1.75 | 2.52 | 2.50 | 2.46 | 1.14 |
| FeOt/(MgO+FeOt) | 0.77 | 0.82 | 0.81 | 0.47 | N.A. | 0.75 | 0.79 | 0.74 | 0.72 | 0.68 | 0.66 | 0.66 | 0.83 |
| Al2O3/TiO2 | 46.41 | 41.64 | 46.85 | 129.60 | 129.22 | 26.03 | 68.14 | 39.94 | 35.97 | 19.17 | 19.65 | 20.10 | 70.17 |
| Sc | 6.92 | 7.44 | 6.43 | 1.90 | 2.02 | 14.1 | 7.41 | 9.26 | 10.2 | 23.6 | 20.5 | 23.1 | 3.05 |
| V | 20.4 | 19.3 | 17.0 | 4.07 | 4.57 | 56.5 | 15.1 | 48.7 | 65.3 | 220 | 204 | 209 | 6.54 |
| Cr | 8.31 | 11.1 | 12.5 | 6.38 | 7.82 | 6.85 | 8.16 | 17.9 | 9.06 | 24.0 | 10.2 | 12.3 | 8.65 |
| Co | 3.08 | 3.27 | 2.85 | 0.15 | 0.22 | 6.31 | 1.78 | 5.58 | 7.76 | 17.6 | 17.8 | 18.9 | 0.98 |
| Ni | 2.53 | 8.31 | 8.02 | 1.82 | 3.01 | 2.30 | 3.48 | 8.55 | 3.67 | 7.22 | 4.49 | 5.79 | 3.13 |
| Cu | 1.21 | 1.09 | 0.86 | 1.55 | 1.00 | 4.14 | 0.50 | 3.65 | 1.09 | 68.2 | 53.6 | 11.3 | 0.37 |
| Zn | 48.6 | 50.6 | 44.5 | 4.99 | 11.5 | 75.5 | 39.7 | 46.5 | 63.6 | 106 | 102 | 106 | 46.9 |
| Ga | 21.0 | 21.2 | 21.3 | 13.7 | 13.8 | 21.6 | 21.6 | 17.9 | 22.7 | 23.7 | 22.8 | 24.7 | 24.8 |
| Rb | 151 | 153 | 153 | 179 | 172 | 117 | 184 | 96.9 | 107 | 49.5 | 54.0 | 55.3 | 208 |
| Sr | 202 | 192 | 203 | 109 | 119 | 304 | 172 | 282 | 318 | 513 | 529 | 495 | 33.3 |
| Y | 22.6 | 23.8 | 25.7 | 21.6 | 22.4 | 26.6 | 28.0 | 18.2 | 22.7 | 25.3 | 19.8 | 24.3 | 42.7 |
| Zr | 166 | 203 | 217 | 59.1 | 61.9 | 214 | 183 | 108 | 138 | 68.0 | 70.6 | 66.6 | 204 |
| Nb | 11.3 | 12.4 | 13.5 | 4.82 | 4.55 | 12.1 | 14.3 | 8.38 | 12.1 | 10.1 | 8.77 | 9.36 | 23.1 |
| Cs | 2.93 | 3.26 | 3.20 | 4.47 | 3.38 | 2.17 | 4.31 | 1.89 | 2.71 | 1.68 | 1.93 | 2.56 | 5.10 |
| Ba | 843 | 846 | 854 | 889 | 936 | 887 | 675 | 703 | 382 | 403 | 434 | 426 | 146 |
| La | 33.8 | 36.6 | 37.5 | 27.8 | 28.8 | 31.3 | 40.8 | 16.3 | 28.5 | 18.7 | 16.8 | 19.0 | 47.1 |
| Ce | 65.7 | 70.9 | 73.1 | 51.1 | 53.0 | 64.2 | 86.1 | 32.5 | 54.7 | 43.2 | 36.5 | 42.8 | 91.5 |
| Pr | 6.86 | 7.39 | 7.61 | 5.13 | 5.32 | 6.88 | 9.89 | 3.61 | 5.94 | 5.29 | 4.36 | 5.19 | 10.5 |
| Nd | 24.0 | 25.6 | 26.4 | 17.1 | 17.9 | 25.4 | 34.4 | 13.7 | 20.9 | 21.7 | 17.6 | 21.2 | 34.3 |
| Sm | 4.55 | 4.92 | 5.11 | 3.25 | 3.37 | 5.20 | 6.83 | 3.01 | 4.11 | 4.89 | 3.84 | 4.77 | 6.69 |
| Eu | 0.79 | 0.76 | 0.80 | 0.38 | 0.41 | 1.36 | 0.94 | 0.70 | 0.76 | 1.21 | 1.11 | 1.29 | 0.29 |
| Gd | 4.46 | 4.56 | 4.50 | 3.31 | 3.52 | 5.16 | 5.64 | 3.01 | 3.92 | 4.83 | 3.98 | 4.93 | 6.79 |
| Tb | 0.64 | 0.67 | 0.73 | 0.52 | 0.54 | 0.76 | 0.86 | 0.49 | 0.63 | 0.73 | 0.57 | 0.71 | 1.07 |
| Dy | 3.60 | 3.76 | 4.08 | 3.23 | 3.31 | 4.27 | 4.77 | 2.85 | 3.61 | 4.19 | 3.25 | 4.01 | 6.50 |
| Ho | 0.77 | 0.80 | 0.87 | 0.73 | 0.76 | 0.92 | 1.00 | 0.62 | 0.78 | 0.88 | 0.70 | 0.85 | 1.41 |
| Er | 2.37 | 2.47 | 2.69 | 2.30 | 2.37 | 2.81 | 3.12 | 1.93 | 2.39 | 2.61 | 2.08 | 2.53 | 4.57 |
| Tm | 0.34 | 0.35 | 0.41 | 0.31 | 0.33 | 0.41 | 0.47 | 0.28 | 0.34 | 0.37 | 0.29 | 0.35 | 0.70 |
| Yb | 2.29 | 2.41 | 2.74 | 2.00 | 2.13 | 2.70 | 3.23 | 1.94 | 2.33 | 2.40 | 1.88 | 2.26 | 4.80 |
| Lu | 0.35 | 0.37 | 0.42 | 0.30 | 0.32 | 0.42 | 0.51 | 0.31 | 0.35 | 0.36 | 0.28 | 0.34 | 0.73 |
| Hf | 4.08 | 4.92 | 5.48 | 1.92 | 1.96 | 5.23 | 5.43 | 2.86 | 3.58 | 2.01 | 1.93 | 1.94 | 8.07 |
| Ta | 1.20 | 1.34 | 1.52 | 1.08 | 0.88 | 2.33 | 1.83 | 0.78 | 1.34 | 1.30 | 0.90 | 0.97 | 2.88 |
| Pb | 22.9 | 21.1 | 23.0 | 32.6 | 30.7 | 16.5 | 27.9 | 13.6 | 13.6 | 10.5 | 9.75 | 10.8 | 19.1 |
| Th | 13.2 | 15.5 | 15.2 | 11.7 | 11.8 | 9.32 | 19.0 | 3.08 | 6.56 | 1.39 | 0.78 | 2.62 | 25.0 |
| U | 1.72 | 2.10 | 2.12 | 3.53 | 4.01 | 1.35 | 2.34 | 0.86 | 1.14 | 0.38 | 0.24 | 0.64 | 4.91 |
| Rb/Sr | 0.75 | 0.80 | 0.75 | 1.65 | 1.45 | 0.39 | 1.07 | 0.34 | 0.34 | 0.10 | 0.10 | 0.11 | 6.26 |
| ∑REE | 150 | 161 | 167 | 117 | 122 | 152 | 199 | 81.3 | 129 | 111 | 93.2 | 110 | 217 |
| LREE/ HREE | 9.16 | 9.49 | 9.16 | 8.25 | 8.19 | 7.70 | 9.13 | 6.12 | 8.01 | 5.80 | 6.15 | 5.90 | 7.17 |
| La/Yb N | 10.04 | 10.30 | 9.28 | 9.46 | 9.19 | 7.87 | 8.58 | 5.72 | 8.31 | 5.29 | 6.05 | 5.71 | 6.67 |
| Eu/Eu* | 0.54 | 0.49 | 0.51 | 0.35 | 0.36 | 0.80 | 0.46 | 0.71 | 0.58 | 0.76 | 0.87 | 0.81 | 0.13 |
| *Note: N.*A. = not applicable, LOI = loss on ignition, A/CNK = molar Al2O3/(CaO+Na2O+K2O), A/NK = molar Al2O3/(Na2O+K2O), REE = rare earth element, LREE = light rare earth element, HREE = heavy rare earth element, N = normalized to chondrite, Eu/Eu* = EuN/(SmN*GdN)1/2. | | | | | | | | | | | | | |

**tABLE DR3. Continued**

| Samples | 14LQ30B | 14LQ31A | 14LQ33A | 14LQ33B | 14LQ37A | 14LQ37B | 14LQ38A | 14LQ38B | 14LQ39A | 14LQ44A | 14LQ44B | 14LQ45A | 14LQ45B |
| --- | --- | --- | --- | --- | --- | --- | --- | --- | --- | --- | --- | --- | --- |
| SiO2 | 77.18 | 71.22 | 64.31 | 63.70 | 66.90 | 65.84 | 69.83 | 68.68 | 66.34 | 71.36 | 71.80 | 75.07 | 75.03 |
| TiO2 | 0.16 | 0.37 | 0.51 | 0.54 | 0.59 | 0.62 | 0.52 | 0.60 | 0.84 | 0.29 | 0.29 | 0.06 | 0.08 |
| Al2O3 | 11.81 | 14.04 | 15.84 | 15.85 | 15.87 | 16.14 | 15.19 | 15.43 | 15.07 | 15.02 | 14.54 | 13.47 | 13.59 |
| Fe2O3t | 1.17 | 2.58 | 5.25 | 5.63 | 3.24 | 3.50 | 2.62 | 3.11 | 4.32 | 1.46 | 1.51 | 0.36 | 0.60 |
| MnO | 0.027 | 0.037 | 0.104 | 0.131 | 0.056 | 0.059 | 0.055 | 0.056 | 0.066 | 0.018 | 0.019 | 0.011 | 0.019 |
| MgO | 0.22 | 0.51 | 2.36 | 2.58 | 2.19 | 2.44 | 1.73 | 1.82 | 2.56 | 0.68 | 0.65 | 0.22 | 0.25 |
| CaO | 0.86 | 1.46 | 5.05 | 5.42 | 3.89 | 4.03 | 3.26 | 3.53 | 3.82 | 2.15 | 2.14 | 1.45 | 1.22 |
| Na2O | 3.36 | 4.26 | 2.81 | 2.77 | 4.32 | 4.29 | 4.09 | 4.39 | 3.84 | 4.29 | 3.83 | 3.72 | 3.68 |
| K2O | 4.61 | 4.71 | 3.03 | 2.91 | 2.4 | 2.35 | 2.57 | 2.07 | 2.79 | 3.31 | 3.57 | 4.4 | 4.37 |
| P2O5 | 0.017 | 0.061 | 0.096 | 0.106 | 0.114 | 0.118 | 0.110 | 0.134 | 0.200 | 0.075 | 0.082 | 0.037 | 0.040 |
| LOI | 0.40 | 0.39 | 0.99 | 0.79 | 0.60 | 0.20 | 0.39 | 0.20 | 0.59 | 0.39 | 1.18 | 0.59 | 0.57 |
| TOTAL | 99.82 | 99.65 | 100.35 | 100.43 | 100.17 | 99.59 | 100.36 | 100.03 | 100.43 | 99.04 | 99.61 | 99.38 | 99.49 |
| A/CNK | 0.98 | 0.95 | 0.93 | 0.90 | 0.94 | 0.95 | 0.98 | 0.97 | 0.92 | 1.03 | 1.03 | 1.00 | 1.04 |
| A/NK | 1.12 | 1.16 | 2.00 | 2.05 | 1.63 | 1.68 | 1.60 | 1.63 | 1.61 | 1.41 | 1.43 | 1.24 | 1.26 |
| FeOt/(MgO +FeOt) | 0.83 | 0.82 | 0.67 | 0.66 | 0.57 | 0.56 | 0.58 | 0.61 | 0.60 | 0.66 | 0.68 | 0.60 | 0.68 |
| Al2O3/TiO2 | 74.28 | 37.84 | 31.18 | 29.30 | 26.94 | 26.16 | 29.32 | 25.72 | 17.90 | 51.26 | 49.79 | 232.24 | 169.88 |
| Sc | 2.19 | 6.28 | 15.8 | 17.5 | 9.46 | 10.1 | 7.64 | 9.39 | 11.4 | 4.73 | 5.01 | 2.10 | 2.29 |
| V | 5.30 | 21.9 | 142 | 157 | 72.0 | 73.7 | 54.7 | 64.4 | 88.5 | 34.3 | 31.5 | 9.52 | 12.0 |
| Cr | 7.39 | 6.60 | 7.22 | 10.3 | 39.5 | 43.0 | 30.1 | 29.4 | 46.1 | 14.4 | 16.5 | 10.8 | 7.39 |
| Co | 0.90 | 2.54 | 12.4 | 13.4 | 9.68 | 10.5 | 6.76 | 8.49 | 12.2 | 3.28 | 3.31 | 0.79 | 0.86 |
| Ni | 2.66 | 2.85 | 4.03 | 9.32 | 21.7 | 22.9 | 16.2 | 16.0 | 29.3 | 4.54 | 5.73 | 4.46 | 2.04 |
| Cu | 0.43 | 1.77 | 60.1 | 13.4 | 9.55 | 11.5 | 30.0 | 3.11 | 7.43 | 6.53 | 8.07 | 2.39 | 1.83 |
| Zn | 36.2 | 88.0 | 72.0 | 75.1 | 51.9 | 54.8 | 56.0 | 52.7 | 58.9 | 37.3 | 40.3 | 13.2 | 15.8 |
| Ga | 24.0 | 28.2 | 18.7 | 18.6 | 21.2 | 21.3 | 19.6 | 23.0 | 21.5 | 20.9 | 20.6 | 15.8 | 15.3 |
| Rb | 215 | 121 | 97.0 | 91.0 | 84.5 | 84.1 | 92.4 | 77.9 | 84.6 | 145 | 156 | 160 | 171 |
| Sr | 30.6 | 112 | 379 | 390 | 417 | 461 | 382 | 380 | 441 | 343 | 319 | 110 | 103 |
| Y | 42.9 | 50.2 | 15.1 | 17.1 | 12.4 | 12.9 | 11.6 | 14.0 | 18.7 | 7.18 | 7.39 | 33.7 | 17.7 |
| Zr | 146 | 365 | 160 | 115 | 169 | 197 | 129 | 194 | 145 | 147 | 134 | 45.4 | 49.3 |
| Nb | 23.1 | 22.5 | 7.84 | 8.08 | 6.47 | 6.83 | 7.24 | 8.88 | 12.5 | 7.47 | 6.95 | 6.30 | 9.03 |
| Cs | 4.31 | 2.52 | 3.20 | 2.77 | 5.09 | 5.71 | 5.29 | 4.30 | 3.23 | 6.78 | 6.64 | 6.24 | 7.87 |
| Ba | 135 | 664 | 407 | 418 | 441 | 516 | 451 | 321 | 475 | 405 | 424 | 323 | 314 |
| La | 48.0 | 49.1 | 17.4 | 20.9 | 21.1 | 17.0 | 19.5 | 29.1 | 26.7 | 12.7 | 18.2 | 17.7 | 8.29 |
| Ce | 100 | 101 | 37.1 | 43.9 | 41.8 | 35.6 | 38.5 | 55.6 | 58.4 | 22.7 | 34.6 | 35.6 | 15.9 |
| Pr | 11.1 | 12.0 | 4.01 | 4.61 | 4.51 | 4.07 | 4.15 | 5.58 | 6.64 | 2.69 | 3.91 | 4.03 | 1.97 |
| Nd | 36.8 | 44.3 | 15.0 | 17.0 | 16.2 | 15.5 | 15.1 | 19.0 | 24.6 | 9.51 | 13.6 | 14.5 | 7.24 |
| Sm | 7.44 | 9.39 | 3.08 | 3.41 | 3.08 | 3.11 | 2.90 | 3.28 | 4.64 | 1.87 | 2.36 | 3.54 | 1.76 |
| Eu | 0.27 | 1.04 | 0.86 | 0.91 | 0.88 | 0.92 | 0.80 | 0.87 | 1.15 | 0.56 | 0.59 | 0.51 | 0.48 |
| Gd | 6.97 | 9.09 | 3.02 | 3.35 | 2.79 | 2.86 | 2.56 | 2.99 | 4.13 | 1.62 | 1.91 | 3.78 | 2.01 |
| Tb | 1.19 | 1.44 | 0.43 | 0.48 | 0.40 | 0.41 | 0.38 | 0.41 | 0.62 | 0.24 | 0.26 | 0.75 | 0.40 |
| Dy | 6.96 | 8.32 | 2.42 | 2.68 | 2.13 | 2.22 | 2.01 | 2.24 | 3.32 | 1.26 | 1.32 | 4.89 | 2.65 |
| Ho | 1.49 | 1.80 | 0.53 | 0.58 | 0.43 | 0.45 | 0.40 | 0.45 | 0.67 | 0.25 | 0.26 | 1.09 | 0.58 |
| Er | 4.64 | 5.51 | 1.65 | 1.80 | 1.24 | 1.31 | 1.19 | 1.38 | 1.95 | 0.76 | 0.79 | 3.54 | 1.91 |
| Tm | 0.68 | 0.78 | 0.24 | 0.26 | 0.18 | 0.18 | 0.17 | 0.20 | 0.27 | 0.11 | 0.11 | 0.56 | 0.30 |
| Yb | 4.50 | 5.08 | 1.67 | 1.79 | 1.16 | 1.19 | 1.10 | 1.36 | 1.74 | 0.76 | 0.78 | 3.92 | 2.05 |
| Lu | 0.65 | 0.75 | 0.27 | 0.28 | 0.18 | 0.18 | 0.16 | 0.21 | 0.26 | 0.12 | 0.12 | 0.58 | 0.30 |
| Hf | 4.97 | 9.69 | 4.11 | 3.00 | 4.00 | 4.61 | 3.28 | 4.60 | 3.67 | 3.76 | 3.51 | 1.52 | 1.57 |
| Ta | 2.85 | 2.13 | 1.55 | 1.27 | 0.97 | 1.13 | 1.34 | 1.25 | 4.79 | 2.05 | 1.48 | 1.45 | 2.20 |
| Pb | 21.1 | 21.3 | 9.83 | 9.91 | 10.7 | 11.2 | 12.1 | 9.94 | 12.2 | 22.9 | 22.0 | 30.9 | 30.7 |
| Th | 25.6 | 12.9 | 7.26 | 15.5 | 13.5 | 6.20 | 8.39 | 11.1 | 8.01 | 15.3 | 11.6 | 12.6 | 5.71 |
| U | 3.75 | 4.09 | 2.06 | 2.15 | 1.95 | 1.60 | 1.61 | 2.10 | 1.41 | 1.09 | 1.14 | 3.05 | 2.15 |
| Rb/Sr | 7.03 | 1.08 | 0.26 | 0.23 | 0.20 | 0.18 | 0.24 | 0.20 | 0.19 | 0.42 | 0.49 | 1.46 | 1.66 |
| ∑REE | 231 | 249 | 87.7 | 102 | 96.0 | 85.1 | 88.9 | 123 | 135 | 55.1 | 78.8 | 95.0 | 46 |
| LREE/HREE | 7.52 | 6.60 | 7.57 | 8.10 | 10.30 | 8.65 | 10.15 | 12.28 | 9.41 | 9.78 | 13.19 | 3.97 | 3.49 |
| La/Yb N | 7.26 | 6.56 | 7.05 | 7.94 | 12.35 | 9.67 | 12.00 | 14.51 | 10.40 | 11.28 | 15.81 | 3.07 | 2.75 |
| Eu/Eu* a | 0.11 | 0.34 | 0.85 | 0.82 | 0.91 | 0.94 | 0.89 | 0.85 | 0.80 | 0.98 | 0.85 | 0.42 | 0.79 |
| *Note: N.*A. = not applicable, LOI = loss on ignition, A/CNK = molar Al2O3/(CaO+Na2O+K2O), A/NK = molar Al2O3/(Na2O+K2O), REE = rare earth element, LREE = light rare earth element, HREE = heavy rare earth element, N = normalized to chondrite, Eu/Eu* = EuN/(SmN*GdN)1/2. | | | | | | | | | | | | | |
